# Supplementary material for: Quantitative Trait Loci for Obesity- and Diabetes-Related Traits and Their Dietary Responses to High-Fat Feeding in LGXSM Recombinant Inbred Mouse Strains
Source: Oxford University Press journal article supplement (doi:10.2337/diabetes.53.12.3328), 2004-12-01
Supplement: 3328-sup-db0894onlineappendixb.xls [file 3328-sup-db0894onlineappendixb.xls]

## Sheet: Sheet1
Appendix B: List of GENUINE and SHADOW QTL sites for each trait, including LOD score, confidence region, list of sites that SHADOW QTLs are copies of, and least squares means, standard errors, and sample sizes for the LG/J and SM/J alleles in each sex, diet cohort.
									FEMALES												MALES
				CONFIDENCE REGION					LOW FAT			LOW FAT			HIGH FAT			HIGH FAT			LOW FAT			LOW FAT			HIGH FAT			HIGH FAT
TYPE	TRAIT	MARKER	LOD	CENTROMERIC	TELOMERIC	ASSOCIATED GENUINE SITES			LG/J	SE	N	SM/J	SE	N	LG/J	SE	N	SM/J	SE	N	LG/J	SE	N	SM/J	SE	N	LG/J	SE	N	SM/J	SE	N
GENUINE	ADULT	D2MIT119	2.76079	D2MIT1	D2MIT119				0.0967028	0.00416858	76	0.0866152	0.00590235	35	0.148049	0.00538146	77	0.112461	0.00788094	36	0.102309	0.00516406	81	0.0578026	0.00771928	30	0.12194	0.00560348	82	0.0682322	0.00894142	31
	ADULT	D7MIT109	3.7037	D7MIT332	D7MIT46				0.101755	0.00702348	30	0.0882133	0.00369654	90	0.172055	0.0089502	27	0.122246	0.00481956	95	0.126234	0.00792008	36	0.0754866	0.00489522	86	0.14156	0.00870017	34	0.0946107	0.00568183	90
	ADULT	D12MIT37	2.63681	D12MIT145	D12MIT84				0.0838077	0.00428363	71	0.0986413	0.00458594	57	0.125876	0.00533475	74	0.147945	0.00611977	56	0.0769939	0.0057533	66	0.113853	0.00574629	61	0.0901519	0.00610839	72	0.129068	0.00647657	59
	ADULT	D12MIT8	2.34919	D12MIT8	D12NDS2				0.104518	0.00505107	58	0.0792271	0.00454593	62	0.153131	0.006018	58	0.12373	0.00562997	64	0.0978633	0.00595542	63	0.0846257	0.00633817	56	0.128443	0.00616121	67	0.0831447	0.00693615	58
	ADULT	D17MIT11	4.06734	D17MIT175	D17MIT115				0.111366	0.00605239	43	0.0816727	0.00429919	69	0.172045	0.00753878	42	0.117651	0.00554864	73	0.113965	0.00730175	42	0.0758275	0.005603	70	0.136089	0.00760824	45	0.0927076	0.00643755	70
SHADOW	ADULT	D1MIT10	2.49085	D1MIT10	D1MIT139	D17MIT11			0.0958412	0.00432413	76	0.0803123	0.00539286	44	0.150929	0.00535604	77	0.112372	0.00686291	46	0.10295	0.00544475	76	0.0739151	0.00761616	41	0.121431	0.00564803	78	0.0818172	0.00806022	44
	ADULT	D2MIT226	2.562	D2MIT50	D2MIT311	D12MIT37			0.09862	0.00410039	84	0.0758493	0.00597132	36	0.152429	0.00486645	87	0.107494	0.00757613	35	0.0957307	0.00500892	87	0.0809484	0.00848525	32	0.120081	0.00521957	93	0.0726896	0.00941217	32
	ADULT	D3MIT28	3.34005	D3MIT49	D3MIT28	D2MIT119			0.0967032	0.00477073	60	0.0820374	0.00421202	68	0.150725	0.00589744	62	0.117579	0.00554569	68	0.106197	0.00610246	65	0.0754352	0.00574918	62	0.131639	0.00657024	65	0.0778512	0.00622311	66
	ADULT	D6NDS5	3.99998	D6MIT209	D6MIT150	D17MIT11			0.0825412	0.00442841	64	0.10876	0.00569871	48	0.126247	0.0055416	67	0.15638	0.00694401	47	0.0690443	0.00530241	69	0.115321	0.00728325	45	0.0825637	0.00618943	70	0.13913	0.00808484	48
	ADULT	D8MIT89	2.08659	D8MIT316	D8MIT89	D2MIT119			0.0839836	0.00441442	69	0.0904181	0.00638743	39	0.115259	0.00555661	70	0.172432	0.00747707	40	0.0865228	0.00584403	69	0.106598	0.00745414	40	0.0923379	0.00648403	69	0.127896	0.00788294	41
	ADULT	D9MIT8	2.66908	D9MIT289	D9MIT53	ALL			0.0797448	0.00392194	84	0.110547	0.005407	44	0.132621	0.00484499	89	0.137521	0.007359	41	0.0783405	0.00490352	88	0.118262	0.00797339	39	0.0897085	0.00531667	89	0.137826	0.00853459	42
	ADULT	D15MIT231	2.01107	D15MIT220	D15MIT66	D12MIT37			0.0740542	0.00492507	49	0.09856	0.00414588	79	0.113559	0.00652361	48	0.146508	0.0051596	82	0.078597	0.00649038	49	0.0981474	0.005461	78	0.0893358	0.00723683	48	0.113991	0.00579302	83
	ADULT	DXMIT186	1.80406	DXMIT186	DXMIT186	D7MIT109	D12MIT8	D17MIT11	0.0848676	0.00364897	96	0.115678	0.00853347	24	0.129359	0.00457899	96	0.169819	0.00933282	26	0.0873701	0.00488377	93	0.104536	0.00985645	26	0.0974972	0.00535775	96	0.131431	0.00946063	29
GENUINE	G020	D6MIT96	2.97132	D6MIT96	D6MIT186				106.638	3.74896	53	117.111	4.21806	40	125.736	3.80979	54	148.092	4.51539	41	123.68	4.82692	58	143.45	6.19899	36	146.071	6.20141	61	198.358	9.08824	35
	G020	D19MIT28	3.22291	D19MIT43	D19MIT16				113.581	2.97761	69	105.213	3.93971	43	139.791	3.38547	66	120.083	4.00605	46	139.413	4.38154	64	107.419	4.98758	47	180.633	6.18601	65	140.075	7.11331	47
	G020	DXMIT144	2.11879	DXMIT144	DXMIT121				111.049	2.71187	92	105.834	4.09837	36	134.474	2.88778	93	120.719	4.64088	34	137.676	3.63556	85	107.401	5.17557	41	168.77	5.06526	87	138.853	7.01631	40
SHADOW	G020	D4MIT2	2.28983	D4MIT235	D4MIT2	DXMIT144			105.809	4.44886	36	111.535	2.62371	92	116.614	4.38369	40	137.59	2.96682	87	112.192	5.47612	38	138.251	3.61605	88	140.62	6.53468	47	170.687	5.31231	80
	G020	D4MIT153	2.89742	D4MIT17	D4MIT31	D6MIT96	D19MIT28		105.431	4.40035	37	111.707	2.64056	91	119.475	4.42969	39	136.29	2.95266	88	112.506	5.47612	38	138.108	3.61605	88	131.04	6.92291	43	175.042	5.20972	84
	G020	D11MIT79	3.34831	D11MIT71	D11MIT349	DXMIT144			110.947	3.06782	76	108.317	3.77418	44	137.289	3.19748	78	121.961	4.27291	41	142.494	4.02484	76	107.606	5.05858	42	177.262	5.53281	77	131.608	6.89892	44
	G020	D11MIT333	3.35179	D11MIT258	D11MIT336	D19MIT28			105.703	3.28122	61	114.56	3.22831	59	124.563	3.38153	62	139.027	3.6068	57	113.734	4.16027	68	142.121	4.73334	53	142.494	5.95822	63	185.795	6.46402	57
	G020	D15MIT242	2.18693	D15MIT242	D15MIT242	D6MIT96			113.962	3.35107	57	106.42	3.55401	55	140.156	3.63335	57	124.96	3.65748	54	138.229	4.67659	57	116.909	4.6498	56	183.127	6.93505	53	144.089	5.93642	61
GENUINE	AUC20	D6MIT96	4.72437	D6MIT96	D6MIT96				19278.3	1209.83	53	23404.5	1361.21	40	22592.7	1112.54	54	29507.1	1366.64	40	22673.6	1119.6	58	30723.9	1453.43	35	29213.4	1247.2	61	42344.7	1835.33	34
	AUC20	D19MIT28	2.76955	D19MIT43	D19MIT16				22016.3	956.903	69	18808.6	1266.09	43	27049.1	990.46	65	22967.5	1144.69	46	28106.4	1069.38	63	21444.8	1214.54	46	37695.3	1215.53	64	28085.1	1393.19	47
	AUC20	DXMIT173	4.25763	DXMIT64	DXMIT121				19493.1	928.995	74	22352.1	1119.97	46	22216.1	911.922	72	30361.7	1130.49	46	22396.4	930.618	79	30339.1	1214.84	40	30665.6	1131.43	73	38783.9	1328.97	46
SHADOW	AUC20	D1MIT115	2.14934	D1MIT541	D1MIT221	D6MIT96			20052	909.922	81	21696.4	1416	31	24258	872.256	81	27760.8	1498.39	29	22259.9	867.555	81	32483.4	1517.97	30	31176.8	1019.98	84	39385.4	1847.01	29
	AUC20	D2MIT354	2.03135	D2MIT1	D2MIT215	D6MIT96			19279	936.278	69	22203.9	1047.41	50	23228.8	975.568	64	28779.5	1057.85	53	24575.7	990.125	70	29177.5	1149.24	44	31678.2	1104.49	73	37268.2	1431.26	42
	AUC20	D2MIT447	1.88152	D2MIT62	D2MIT166	ALL			21909.9	1028.53	63	18681.4	1002.52	57	27062.4	1003.4	64	23548.2	1032.58	54	28113.6	1034.56	62	24205	1025.06	54	37024.1	1165.83	67	29586.4	1267.86	53
	AUC20	D4MIT18	2.83408	D4MIT235	D4MIT2	ALL			17621.5	1312.62	38	21575.2	796.295	90	23190.7	1263.33	36	25975.4	812.751	90	20774	1286.03	38	28509.2	863.788	86	27068.1	1373.28	42	36293	1044.58	84
	AUC20	D11MIT173	2.24137	D11MIT62	D11MIT349	ALL			21887	967.661	67	18701.7	1235.46	45	26259.6	1003.14	64	23924.4	1149.92	46	27594.6	976.761	69	21962.7	1191.09	42	37823.4	1244.11	63	27787	1286.25	50
	AUC20	D11MIT333	2.43614	D11MIT258	D11MIT336	D19MIT28			19494.9	1027.57	61	21533.2	1011	59	23485.3	968.38	62	26583.9	1060.36	56	22170	982.45	67	28328.6	1122.39	52	29122.8	1187.45	63	38227.6	1293.04	56
	AUC20	D15MIT242	3.04078	D15MIT242	D15MIT242	D6MIT96			22102.8	1050.41	57	18940.9	1114.02	55	27643.6	1079.51	56	22874	1058.53	54	28311.1	1079.74	55	22050.7	1059.52	56	38602.3	1368.74	52	28441.9	1167.77	61
	AUC20	D16MIT152	2.16799	D16MIT188	D16MIT152	D6MIT96			19020.5	1291.92	42	21857.4	937.279	70	22371.7	1229.34	42	27496	931.652	69	21805.6	1379.36	38	27835.8	950.301	71	29800.2	1426.48	48	36409	1193.61	63
	AUC20	D17MIT198	2.09162	D17MIT46	D17MIT198	DXMIT173			18032.4	1587.22	29	21587.9	853.358	85	23062.6	1475.45	28	26659	870.309	84	21541.1	1554.75	27	28880	947.829	79	27008	1733.6	27	36437.1	1027.18	87
GENUINE	TOTFAT	D1MIT187	3.68059	D1MIT10	D1MIT139				5.24468	0.338202	73	3.39234	0.401834	47	10.4606	0.426802	76	5.89423	0.550106	45	5.50901	0.225884	75	3.59854	0.311119	42	8.71159	0.281229	77	5.24399	0.394644	42
	TOTFAT	D8MIT89	3.21428	D8MIT25	D8MIT89				4.27608	0.332467	71	4.22906	0.486937	39	6.74603	0.491666	69	12.3053	0.662148	39	4.07492	0.233029	68	6.08812	0.29665	40	6.13977	0.325809	68	10.0189	0.409011	39
	TOTFAT	D10MIT47N	3.58447	D10MIT178	D10MIT103				5.25271	0.396021	57	3.81461	0.346788	65	11.8387	0.525315	59	5.97549	0.501155	62	5.3519	0.2612	57	4.40179	0.257944	63	9.33524	0.321435	62	6.19052	0.345156	58
	TOTFAT	D11MIT349	2.34012	D11MIT173	D11MIT8				5.09848	0.400997	59	4.09521	0.388658	55	11.0875	0.535854	60	6.88997	0.559679	53	5.76852	0.25767	62	3.78849	0.286507	51	8.97148	0.328633	61	6.43321	0.366902	54
	TOTFAT	D18MIT213	2.90626	D18MIT79	D18MIT213				5.39916	0.465219	43	4.11603	0.294074	87	12.8199	0.603221	44	6.96607	0.422189	84	5.32691	0.2995	46	4.68173	0.219686	79	9.25593	0.361389	48	6.86283	0.282373	79
	TOTFAT	DXMIT186	3.49954	DXMIT186	DXMIT186				4.16784	0.286021	97	6.44267	0.665671	25	7.42072	0.410913	94	15.6151	0.829789	26	4.69231	0.206046	94	5.34908	0.428769	24	7.11075	0.262252	95	9.80128	0.499936	27
SHADOW	TOTFAT	D1MIT282	2.68094	D1MIT178	D1MIT415	D1MIT187			4.99948	0.28985	100	2.43069	0.60403	22	9.70877	0.397428	100	4.72322	0.872494	21	5.35247	0.198222	98	2.81597	0.46467	22	8.30849	0.254221	99	5.05632	0.612891	21
	TOTFAT	D1MIT145	2.40546	D1MIT14	D1MIT507	D8MIT89			5.53635	0.407855	59	3.8927	0.392531	55	11.717	0.536936	59	6.90664	0.552378	54	5.03717	0.25671	57	4.39312	0.275811	51	8.92845	0.315023	65	6.27588	0.372941	49
	TOTFAT	D2MIT226	3.02552	D2MIT412	D2MIT311	ALL			5.17771	0.321951	85	3.513	0.464895	37	10.7258	0.434655	86	5.72724	0.681726	34	5.32495	0.214338	85	3.8211	0.356316	33	8.75932	0.260941	91	5.42793	0.462348	31
	TOTFAT	D3MIT60	2.27637	D3MIT60	D3MIT167	D1MIT187			5.30386	0.430124	48	4.0449	0.303554	82	11.7788	0.562274	50	7.00535	0.439123	78	5.1462	0.301739	40	4.72564	0.219193	85	9.07756	0.359754	49	6.73055	0.287292	78
	TOTFAT	D3MIT14	2.0064	D3MIT14	D3MIT14	D8MIT89			4.52838	0.398738	56	4.50816	0.315917	74	11.0999	0.532449	57	7.00298	0.455051	71	5.44614	0.287667	50	4.44562	0.222981	75	9.14005	0.355913	54	6.42116	0.28773	73
	TOTFAT	D4MIT18	2.00291	D4MIT101	D4MIT89	D8MIT89			4.06117	0.482391	38	4.7242	0.2883	92	11.604	0.648709	36	7.51878	0.408017	92	6.09864	0.317566	39	4.33095	0.21438	86	9.9834	0.387761	40	6.53216	0.27505	87
	TOTFAT	D5MIT47	2.05825	D5MIT47	D5MIT61	D8MIT89	D11MIT349	DXMIT186	5.04453	0.427604	52	4.34166	0.33676	70	11.4142	0.584886	49	7.48987	0.473964	71	5.65004	0.283201	50	4.27275	0.245472	68	9.22564	0.351582	51	6.59766	0.308385	71
	TOTFAT	D7MIT105	2.6876	D7MIT238	D7NDS4	D8MIT89			5.01725	0.393317	58	4.02064	0.349136	64	11.4065	0.525315	59	6.35369	0.501155	62	5.27228	0.263113	56	4.47145	0.256452	64	9.26412	0.323151	61	6.25275	0.343927	59
	TOTFAT	D9MIT19	4.12785	D9MIT201	D9MIT19	D10MIT47N			3.74968	0.344311	64	5.28433	0.35985	66	5.89756	0.503836	59	11.6932	0.474637	69	4.41429	0.258846	61	5.3524	0.243482	64	6.01408	0.34448	54	9.20727	0.288267	73
	TOTFAT	D12MIT219	2.08228	D12MIT145	D12MIT46	ALL			3.82533	0.335519	72	5.66981	0.358136	58	8.00319	0.455861	73	10.1157	0.523967	55	4.28945	0.242642	66	5.87318	0.246909	59	6.73316	0.305999	68	9.07319	0.313995	59
	TOTFAT	D12MIT116	2.48203	D12MIT35	D12MIT5	D1MIT187			5.16928	0.350246	71	3.8031	0.402492	51	10.927	0.476745	70	6.25845	0.579779	50	5.37107	0.236696	71	4.00256	0.299539	47	8.60006	0.291216	73	6.22205	0.383109	49
	TOTFAT	D12MIT8	2.67599	D12MIT133	D12NDS2	D10MIT47N	D18MIT213	DXMIT186	5.38189	0.396029	59	3.95861	0.35539	63	11.6052	0.535065	58	6.83222	0.507488	62	5.17307	0.255849	61	4.51794	0.266945	57	9.16881	0.314179	64	6.31889	0.338112	58
	TOTFAT	D13MIT115	1.85535	D13MIT207	D13MIT177	ALL			6.37273	0.459765	38	3.94931	0.32035	84	11.0873	0.641968	38	8.25895	0.432767	83	5.13106	0.312472	34	4.66058	0.217016	81	9.42583	0.384773	40	6.88772	0.28864	79
	TOTFAT	D13MIT151	2.83463	D13MIT151	D13MIT35	D10MIT47N			5.40718	0.412944	57	4.02188	0.387174	57	11.9505	0.53274	60	6.67309	0.556427	53	5.21599	0.261162	53	4.21429	0.2716	55	9.09488	0.319846	63	6.10945	0.368814	51
	TOTFAT	D15MIT5	2.58284	D15MIT5	D15MIT231	ALL			4.1851	0.32921	68	4.84892	0.373715	62	6.60068	0.48333	63	10.9901	0.495503	65	4.5251	0.235043	68	5.2416	0.266532	57	6.10081	0.298717	66	9.12054	0.335458	61
	TOTFAT	D16MIT84	2.43058	D16MIT39	D16MIT217	ALL			2.94556	0.443735	39	5.2313	0.300855	91	5.32351	0.626023	39	10.3735	0.415274	89	4.60113	0.343831	35	5.01163	0.205839	90	6.41096	0.442349	36	8.156	0.257468	91
	TOTFAT	D17MIT175	3.80159	D17MIT175	D17MIT51	DXMIT186			6.011	0.569299	35	4.35118	0.349439	71	14.5152	0.753208	33	7.63478	0.486039	73	5.75213	0.35763	32	4.64914	0.242617	68	10.3266	0.443382	35	6.95631	0.314511	72
GENUINE	REPRO	D1MIT187	3.52908	D1MIT10	D1MIT139				1.87163	0.122618	73	1.21956	0.145688	47	4.36256	0.194033	76	2.26883	0.25009	45	1.83484	0.0755557	76	1.03196	0.104845	42	3.25777	0.0825801	79	1.69518	0.119414	42
	REPRO	D4MIT18	2.61021	D4MIT235	D4MIT109				1.63596	0.175154	38	1.60493	0.10468	92	5.15867	0.282857	36	2.84973	0.177908	92	2.08292	0.108081	39	1.33893	0.0725586	87	3.61146	0.113544	41	2.32102	0.0817905	88
	REPRO	D8MIT89	2.59348	D8MIT89	D8MIT89				1.56165	0.124162	71	1.63659	0.181849	39	2.70322	0.216764	69	5.32628	0.291926	39	1.31117	0.0770949	69	2.05049	0.0987734	40	2.31343	0.097823	69	3.61227	0.121198	40
	REPRO	D10MIT266	2.14328	D10MIT150	D10MIT103				1.84059	0.142484	57	1.3728	0.124771	65	4.80655	0.229845	59	2.41306	0.219274	62	1.70581	0.0891292	57	1.50576	0.0873626	64	3.17939	0.0940363	63	2.47695	0.101667	59
	REPRO	DXMIT186	2.42607	DXMIT186	DXMIT186				1.52414	0.104184	97	2.12978	0.242471	25	2.94317	0.178795	94	6.5895	0.361055	26	1.53357	0.070009	94	1.66666	0.145684	24	2.5669	0.0783226	95	3.32078	0.142669	28
SHADOW	REPRO	D2MIT226	2.62884	D2MIT412	D2MIT311	ALL			1.83065	0.117271	85	1.2745	0.169338	37	4.35947	0.189126	86	2.29837	0.29663	34	1.78396	0.0728263	85	1.11264	0.121067	33	3.19525	0.0768037	92	1.76254	0.138082	31
	REPRO	D3MIT14	1.6732	D3MIT14	D3MIT14	D8MIT89			1.579	0.14478	56	1.64234	0.114708	74	4.57077	0.232164	57	2.79388	0.198416	71	1.78933	0.0979057	50	1.40195	0.0753087	76	3.30757	0.105304	55	2.27061	0.0852303	74
	REPRO	D7MIT109	2.42069	D7MIT109	D7NDS4	DXMIT186			1.7044	0.200259	31	1.5499	0.105606	91	5.5682	0.332082	27	2.78887	0.179562	94	2.0654	0.119209	35	1.42956	0.0733128	86	3.61902	0.130954	32	2.50866	0.082343	90
	REPRO	D9MIT19	3.66932	D9MIT201	D9MIT19	D10MIT266			1.32099	0.125017	64	1.90826	0.13066	66	2.32268	0.219688	59	4.81986	0.206956	69	1.34894	0.0874629	62	1.79391	0.0828676	64	2.09797	0.102214	55	3.35059	0.0850648	74
	REPRO	D11MIT4	2.11701	D11MIT173	D11MIT8	ALL			1.78933	0.140421	62	1.39594	0.141502	52	4.4812	0.22118	66	2.48179	0.249342	48	1.71249	0.0834372	63	1.38832	0.0874431	48	3.34789	0.0998501	65	2.12117	0.107181	49
	REPRO	D12MIT5	3.38057	D12MIT35	D12MIT158	ALL			1.96644	0.127577	71	1.16352	0.146608	51	4.66318	0.20744	70	2.18633	0.252272	50	1.80207	0.0804231	71	1.19736	0.101776	47	3.14981	0.0857258	74	2.06948	0.114417	49
	REPRO	D13MIT35	2.33172	D13MIT151	D13MIT35	D1MIT187	D10MIT266		1.87363	0.12525	75	1.29919	0.150301	47	4.40995	0.198339	76	2.54012	0.25564	45	1.77055	0.0716559	74	1.20847	0.0984035	42	3.21878	0.0831118	80	2.0097	0.121239	41
	REPRO	D15MIT231	2.98401	D15MIT5	D15MIT231	ALL			1.2056	0.139169	50	1.86004	0.118137	80	2.33295	0.244367	47	4.31426	0.191839	81	1.30122	0.0920941	50	1.73355	0.0789776	76	1.94428	0.106364	47	3.19228	0.0851162	82
	REPRO	D17MIT175	2.26864	D17MIT175	D17MIT175	DXMIT186			2.01533	0.208825	35	1.6253	0.128178	71	6.0082	0.328046	33	3.0701	0.211685	73	1.85937	0.116423	32	1.51551	0.0789818	68	3.51496	0.126255	36	2.58886	0.0926474	72
	REPRO	D18MIT123	2.70896	D18MIT36	D18MIT213	D1MIT187	D4MIT18	DXMIT186	1.88188	0.213238	30	1.59753	0.116478	84	5.73039	0.323566	30	2.9955	0.195094	83	2.05867	0.112637	34	1.32111	0.0726813	74	3.73189	0.126364	35	2.32763	0.087597	80
	REPRO	D19MIT39	2.92539	D19MIT39	D19MIT39	ALL			1.72602	0.130984	68	1.5206	0.138869	54	4.48154	0.210363	67	2.43274	0.233011	54	1.79562	0.0779844	69	1.17088	0.0869051	47	3.36141	0.0937412	68	1.79575	0.102319	53
GENUINE	RENAL	D1MIT212	2.13762	D1MIT64	D1MIT322				0.936978	0.0600951	99	0.748313	0.105117	31	1.96751	0.0897372	101	1.19942	0.172169	27	1.0681	0.0435437	98	0.677136	0.0891842	29	1.72283	0.0674914	101	0.920298	0.13932	27
	RENAL	D1MIT387	3.48306	D1MIT10	D1MIT139				1.02061	0.0715399	73	0.684412	0.0850001	47	2.07575	0.0953682	76	1.17531	0.122921	45	1.08499	0.0484975	77	0.705339	0.0678089	42	1.7157	0.0726712	78	0.98482	0.103497	42
	RENAL	D8MIT89	3.93773	D8MIT89	D8MIT89				0.86755	0.068967	71	0.829639	0.10101	39	1.31544	0.114207	69	2.54517	0.153807	39	0.787046	0.0519708	69	1.23886	0.0665846	40	1.0836	0.0777713	69	2.08065	0.0988257	39
	RENAL	D10MIT266	4.3627	D10MIT178	D10MIT103				1.00603	0.0838396	57	0.788097	0.0734167	65	2.42858	0.121238	59	1.1883	0.115662	62	1.10357	0.057108	58	0.831585	0.0565127	64	2.03065	0.0882404	62	1.0899	0.0935094	59
	RENAL	DXMIT186	2.43418	DXMIT186	DXMIT186				0.83879	0.0590894	97	1.17467	0.137521	25	1.50938	0.0949909	94	3.07844	0.191823	26	0.94654	0.0454922	94	0.986987	0.0928498	25	1.42721	0.0725643	95	1.92844	0.138331	27
SHADOW	RENAL	D1MIT14	2.70925	D1MIT196	D1MIT145	D1MIT387			1.07182	0.0853896	57	0.772032	0.0800608	57	2.39098	0.124185	59	1.353	0.127756	54	0.996734	0.0569126	52	0.836329	0.057926	57	1.81792	0.0829304	60	1.13217	0.0907014	54
	RENAL	D2MIT311	2.69089	D2MIT50	D2MIT311	D1MIT387	D10MIT266		0.968657	0.0632173	93	0.733563	0.108808	29	2.07297	0.0965229	93	1.13629	0.177341	27	1.07968	0.0443548	96	0.610735	0.0927209	23	1.77052	0.0690829	99	0.859048	0.148533	23
	RENAL	D3MIT60	2.54111	D3MIT60	D3MIT167	D1MIT212	D1MIT387		1.01301	0.0901168	48	0.815894	0.0635986	82	2.43885	0.12979	50	1.37748	0.101363	78	1.05069	0.066387	42	0.922152	0.0491562	85	1.89563	0.097115	50	1.29814	0.0791812	78
	RENAL	D4MIT101	2.63536	D4MIT101	D4MIT18	D1MIT387	D8MIT89		0.788528	0.101068	38	0.935849	0.0604029	92	2.37356	0.149741	36	1.50364	0.0941824	92	1.29846	0.0712172	39	0.821219	0.0475426	88	2.17087	0.106872	40	1.22735	0.0750182	88
	RENAL	D4MIT249	2.0822	D4MIT248	D4MIT203	ALL			0.995111	0.100657	42	0.865476	0.0662388	79	2.5532	0.14165	42	1.42441	0.101116	77	1.02882	0.0733236	35	0.951249	0.0504484	81	1.93507	0.105507	39	1.33371	0.0758424	78
	RENAL	D5MIT47	2.69367	D5MIT47	D5MIT61	D8MIT89	DXMIT186		0.952843	0.0883392	52	0.874714	0.0695716	70	2.35975	0.135208	49	1.46548	0.109566	71	1.14962	0.0618422	51	0.824636	0.054197	68	2.03026	0.0972816	51	1.19225	0.0853292	71
	RENAL	D7MIT105	3.24091	D7MIT238	D7NDS4	D8MIT89			0.937795	0.0832672	58	0.847802	0.0739137	64	2.33921	0.121238	59	1.26649	0.115662	62	1.08366	0.0575342	57	0.84901	0.0561807	65	2.0108	0.0887115	61	1.10727	0.0931675	60
	RENAL	D9MIT19	3.62546	D9MIT201	D9MIT19	D1MIT212			0.769851	0.0721378	64	1.00977	0.0753936	66	1.18004	0.1163	59	2.37094	0.10956	69	0.879457	0.0576312	62	1.06125	0.0541592	65	1.18322	0.0937507	55	1.86118	0.0794499	73
	RENAL	D12MIT116	2.1464	D12MIT88	D12MIT5	ALL			1.04024	0.0723576	71	0.704551	0.0831512	51	2.18757	0.110209	70	1.27662	0.134028	50	1.07781	0.0522594	71	0.769862	0.0654873	48	1.68609	0.0805787	73	1.28951	0.106005	49
	RENAL	D12MIT8	2.8411	D12MIT8	D12NDS2	D10MIT266	DXMIT186		1.01892	0.0818161	59	0.807128	0.0734203	63	2.34566	0.123691	58	1.36603	0.117316	62	1.04954	0.0559315	62	0.87158	0.0589378	57	1.94833	0.0869324	64	1.15919	0.0935545	58
	RENAL	D13MIT115	2.04971	D13MIT207	D13MIT177	D1MIT387	D10MIT266		1.17996	0.0964247	38	0.803149	0.0671858	84	2.2949	0.148251	38	1.64439	0.0999398	83	0.988778	0.0677128	35	0.916598	0.0476771	82	2.00808	0.0965248	40	1.27833	0.0717108	80
	RENAL	D13MIT151	3.27584	D13MIT291	D13MIT35	D1MIT212	D10MIT266		1.03942	0.0853896	57	0.804433	0.0800608	57	2.44822	0.123214	60	1.29576	0.128693	53	1.04624	0.0560247	54	0.786824	0.0587852	55	1.86349	0.0805202	63	1.0866	0.0928477	51
	RENAL	D15MIT5	2.28262	D15MIT5	D15MIT231	ALL			0.850778	0.0689741	68	0.928845	0.0782984	62	1.30445	0.111567	63	2.24653	0.114377	65	0.918978	0.0527107	68	1.02173	0.058959	59	1.21912	0.0823302	66	1.82528	0.0912317	62
	RENAL	D16MIT84	2.50058	D16MIT39	D16MIT217	ALL			0.592794	0.0929686	39	1.02482	0.0630333	91	1.09283	0.144505	39	2.08579	0.0958576	89	0.903068	0.0763015	36	1.00094	0.0458839	91	1.1421	0.119532	37	1.69497	0.0709614	91
	RENAL	D17MIT175	4.12177	D17MIT198	D17MIT51	DXMIT186			1.11725	0.118597	35	0.876859	0.0727956	71	2.9774	0.174168	33	1.51203	0.112389	73	1.12243	0.0769669	33	0.910331	0.0530165	68	2.19758	0.112623	35	1.27765	0.0798885	72
GENUINE	MESEN	D1MIT187	3.89812	D1MIT10	D1MIT421				0.883283	0.0582298	73	0.480019	0.0691857	47	1.46562	0.118398	76	0.754471	0.152604	45	1.01553	0.0466086	77	0.617778	0.0651678	42	1.39918	0.0528288	79	0.896669	0.0763923	42
	MESEN	D3MIT60	3.0238	D3MIT60	D3MIT118				0.877341	0.0735703	48	0.634561	0.0519212	82	1.72728	0.147293	50	0.890657	0.115033	78	0.968958	0.0615887	42	0.840516	0.0456032	85	1.53511	0.0661144	51	1.07583	0.0550859	78
	MESEN	D7MIT105	2.69294	D7MIT238	D7MIT105				0.845916	0.0676674	58	0.641031	0.0600662	64	1.58406	0.138716	59	0.906121	0.132336	62	0.997549	0.054361	57	0.821258	0.0530821	65	1.56444	0.0583796	62	0.982585	0.0625384	60
	MESEN	D8MIT89	3.43793	D8MIT316	D8MIT89				0.654468	0.0556677	71	0.684972	0.0815318	39	0.905265	0.0701289	69	1.54466	0.0944456	39	0.714501	0.0484761	69	1.15668	0.0621072	40	1.01815	0.0606003	69	1.56453	0.0750807	40
	MESEN	D10MIT47N	3.57946	D10MIT178	D10MIT14				0.856293	0.0681325	57	0.631951	0.0596623	65	1.66882	0.138716	59	0.831954	0.132336	62	1.02005	0.0539583	58	0.801572	0.0533958	64	1.57532	0.058057	63	0.973065	0.0627679	59
	MESEN	DXMIT186	5.44339	DXMIT186	DXMIT186				0.650381	0.0489975	97	1.11961	0.114034	25	0.975554	0.107651	94	2.29203	0.217388	26	0.836984	0.0428543	94	1.11628	0.0874658	25	1.14906	0.0505147	95	1.77894	0.0920152	28
SHADOW	MESEN	D1MIT282	2.55434	D1MIT178	D1MIT484S	D1MIT187			0.829326	0.0498666	100	0.365917	0.103919	22	1.36751	0.104946	100	0.642434	0.230393	21	0.99297	0.0408766	100	0.545758	0.0969108	22	1.36043	0.0458343	101	0.828874	0.112938	21
	MESEN	D1MIT145	3.23626	D1MIT269	D1MIT507	D3MIT60	DXMIT186		0.915114	0.0700742	59	0.597694	0.0674412	55	1.67527	0.142687	59	0.894308	0.146791	54	0.985517	0.0530128	58	0.774863	0.0574849	51	1.56203	0.0600184	66	0.98323	0.0725609	49
	MESEN	D2MIT258	1.92227	D2MIT304	D2MIT194	ALL			0.862926	0.0653535	63	0.608571	0.0621706	59	1.5216	0.131534	67	0.915711	0.141912	53	0.972468	0.0542714	64	0.801845	0.0543613	55	1.40807	0.062092	67	1.123	0.0633912	56
	MESEN	D2MIT226	3.3197	D2MIT412	D2MIT311	D3MIT60			0.858066	0.0551526	85	0.51655	0.0796397	37	1.50213	0.113871	86	0.712286	0.178598	34	1.01195	0.0442726	86	0.654629	0.0741081	33	1.4544	0.049535	92	0.916321	0.0890569	31
	MESEN	D4MIT249	2.08246	D4MIT156	D4MIT249	ALL			0.838639	0.0825037	42	0.699646	0.054293	79	1.77987	0.166029	42	0.951643	0.118519	77	0.980179	0.0689521	35	0.863074	0.0474407	81	1.52467	0.0737562	40	1.12247	0.0543278	78
	MESEN	D5MIT47	2.93174	D5MIT47	D5MIT61	D7MIT105	D8MIT89	DXMIT186	0.860616	0.0732517	52	0.666635	0.0576894	70	1.62189	0.153228	49	0.98349	0.124169	71	1.10127	0.0582562	51	0.753896	0.0510544	68	1.60468	0.0662162	52	1.05528	0.0594008	71
	MESEN	D6MIT15	2.09017	D6MIT339	D6MIT201	ALL			0.653058	0.0579718	64	0.798149	0.0624184	66	0.947783	0.125753	64	1.461	0.130635	64	0.750278	0.0487226	66	1.02709	0.0548564	61	1.04579	0.0588394	63	1.45032	0.0611394	66
	MESEN	D9MIT19	4.16619	D9MIT201	D9MIT19	D10MIT47N			0.581014	0.0588925	64	0.870193	0.0615504	66	0.768981	0.131985	59	1.6398	0.124336	69	0.767436	0.0534657	62	1.00993	0.0502447	65	0.982149	0.0652218	55	1.51396	0.054279	74
	MESEN	D11MIT349	2.0966	D11MIT349	D11MIT349	D8MIT89	DXMIT186		0.872492	0.0691016	59	0.642281	0.0669754	55	1.53804	0.141519	60	0.983376	0.147811	53	1.09139	0.0531964	63	0.726702	0.0597478	51	1.46505	0.0596442	62	1.10187	0.0679216	54
	MESEN	D12MIT37	2.84595	D12MIT145	D12MIT153	ALL			0.579708	0.0573887	72	0.968764	0.0612572	58	1.02751	0.119417	73	1.4992	0.137258	55	0.759564	0.0502176	67	1.10388	0.0506453	60	1.11081	0.057473	70	1.4768	0.0602059	59
	MESEN	D12MIT8	3.34991	D12MIT8	D12NDS2	D10MIT47N	DXMIT186		0.892614	0.0678427	59	0.614389	0.0608808	63	1.62305	0.140176	58	0.902676	0.132952	62	1.00266	0.0526883	62	0.796755	0.0555203	57	1.59868	0.0592805	65	0.991854	0.0651268	58
	MESEN	D13MIT115	3.06231	D13MIT207	D13MIT177	D3MIT60			1.10664	0.0788689	38	0.600851	0.0549535	84	1.72751	0.170566	38	1.0695	0.114983	83	0.976648	0.0639497	35	0.840211	0.0450274	82	1.60985	0.0744973	40	1.11098	0.0548021	81
	MESEN	D13MIT35	3.38278	D13MIT151	D13MIT35	D3MIT60	D10MIT47N		0.862866	0.05916	75	0.545019	0.0709927	47	1.54789	0.121108	76	0.790582	0.156097	45	1.00782	0.0455302	75	0.679747	0.0629909	42	1.45112	0.0535644	80	0.933351	0.0781369	41
	MESEN	D15MIT231	3.86692	D15MIT5	D15MIT66	ALL			0.479144	0.0655588	50	0.87348	0.0556514	80	0.721673	0.146812	47	1.49402	0.115254	81	0.724295	0.0562968	50	0.987314	0.0480024	77	0.982017	0.0678701	47	1.40768	0.0543118	82
	MESEN	D16MIT84	2.38468	D16MIT4	D16MIT217	ALL			0.460522	0.0758985	39	0.846095	0.0514596	91	0.745972	0.163993	39	1.41276	0.108785	89	0.789955	0.0707865	36	0.933558	0.0425675	91	0.978543	0.0831576	37	1.37056	0.0487807	92
	MESEN	D17MIT175	5.85992	D17MIT175	D17MIT51	D3MIT60	DXMIT186		1.03471	0.0983765	35	0.669675	0.0603841	71	2.10724	0.200552	33	1.00058	0.129414	73	1.18034	0.0733305	33	0.813479	0.0505116	68	1.83327	0.0838123	36	1.112	0.0615025	72
	MESEN	D18MIT213	3.02409	D18MIT213	D18MIT213	DXMIT186			0.917767	0.0795731	43	0.638257	0.0502997	87	1.76033	0.15802	44	0.95169	0.110597	84	1.01904	0.0614515	47	0.829427	0.0454647	80	1.55975	0.0672521	49	1.10638	0.0536082	80
GENUINE	ING	D1MIT419	3.156	D1MIT387	D1MIT421				1.41497	0.0992052	92	0.8645	0.167882	30	2.48917	0.107961	92	1.37498	0.192159	29	1.52945	0.0752045	92	0.859011	0.143453	29	2.29009	0.10188	94	1.29741	0.20571	27
	ING	D8MIT89	2.4862	D8MIT316	D8MIT13N				1.19242	0.106941	71	1.07786	0.156628	39	1.82211	0.128063	69	2.88921	0.172468	39	1.23597	0.0839038	68	1.6421	0.106811	40	1.70193	0.131972	68	2.66758	0.161531	40
	ING	D10MIT266	3.91511	D10MIT178	D10MIT14				1.5498	0.129383	57	1.02176	0.113298	65	2.93477	0.136597	59	1.54218	0.130315	62	1.48474	0.0948709	58	1.23335	0.0945862	63	2.48282	0.123954	63	1.6251	0.135793	58
	ING	D18MIT213	2.72912	D18MIT213	D18MIT213				1.61072	0.154098	43	1.1398	0.0974081	87	3.12861	0.160274	44	1.84227	0.112174	84	1.51922	0.109748	47	1.37726	0.0816278	79	2.51745	0.142075	49	1.87251	0.11438	79
SHADOW	ING	D2MIT226	2.28296	D2MIT412	D2MIT311	D1MIT419			1.49172	0.106284	85	0.9986	0.153473	37	2.6979	0.115515	86	1.57954	0.181178	34	1.46378	0.078591	86	1.26765	0.131554	33	2.3413	0.104047	92	1.60958	0.187061	31
	ING	D7MIT105	3.24336	D7MIT238	D7MIT105	D1MIT419	D8MIT89		1.5096	0.1285	58	1.05694	0.114065	64	2.84112	0.136597	59	1.62412	0.130315	62	1.47395	0.095579	57	1.24279	0.0940389	64	2.49429	0.124642	62	1.61507	0.135309	59
	ING	D9MIT82	2.18664	D9MIT201	D9MIT19	ALL			1.11612	0.107318	72	1.50662	0.128481	58	1.72916	0.124783	68	2.9065	0.13579	60	1.44721	0.0892222	70	1.38872	0.0971581	56	1.80382	0.129708	62	2.4215	0.121631	66
	ING	D11MIT349	2.85049	D11MIT349	D11MIT349	D1MIT419	D8MIT89		1.4951	0.130519	59	1.12511	0.126503	55	2.74513	0.139349	60	1.80481	0.145545	53	1.63777	0.0928805	63	1.00366	0.104319	51	2.44054	0.126576	62	1.65326	0.144142	54
	ING	D11MIT117	2.01524	D11MIT4	D11MIT8	ALL			1.5479	0.11489	73	0.959014	0.134349	49	2.67943	0.121363	75	1.7017	0.15353	46	1.48068	0.0845227	73	1.26531	0.112619	43	2.25461	0.11751	75	1.78702	0.159634	45
	ING	D12MIT37	2.20154	D12MIT145	D12MIT84	ALL			1.0363	0.111136	72	1.70474	0.118628	58	2.00391	0.121121	73	2.64481	0.139216	55	1.30391	0.0901573	66	1.61782	0.0904493	60	1.8833	0.12269	69	2.39198	0.127189	59
	ING	D12MIT8	2.40345	D12MIT17	D12NDS2	D10MIT266	D18MIT213		1.62158	0.130739	59	1.06989	0.117323	63	2.91701	0.142201	58	1.8072	0.134872	62	1.42063	0.0935302	62	1.37894	0.0985574	57	2.4239	0.124517	65	1.8117	0.136796	58
	ING	D13MIT115	2.11932	D13MIT207	D13MIT60	D10MIT266			2.01774	0.151651	38	1.05584	0.105666	84	2.90107	0.169588	38	2.06553	0.114324	83	1.38148	0.116254	35	1.39928	0.0822725	81	2.45177	0.15682	40	1.92787	0.116505	80
	ING	D16MIT84	2.47318	D16MIT39	D16MIT217	ALL			0.786267	0.146982	39	1.51456	0.0996545	91	1.40943	0.166332	39	2.62371	0.110337	89	1.36845	0.127756	35	1.4458	0.0760228	91	1.72714	0.179182	36	2.23174	0.103053	92
	ING	D17MIT11	3.15649	D17MIT175	D17MIT115	D8MIT89			1.67963	0.156781	44	1.07981	0.111381	70	3.06724	0.164612	42	1.77353	0.12174	72	1.52692	0.114179	41	1.19971	0.0872717	70	2.53275	0.151358	44	1.72729	0.127057	69
	ING	DXMIT121	3.24437	DXMIT121	DXMIT186	ALL			1.04104	0.094023	100	2.35264	0.165907	30	2.07458	0.103489	100	2.97946	0.198536	28	1.32397	0.0736368	100	1.84479	0.145667	26	2.00017	0.102725	99	2.39421	0.183882	29
GENUINE	LIVER	D10MIT47N	2.59264	D10MIT178	D10MIT14				1.39331	0.0500714	57	1.28389	0.0438465	65	2.63951	0.0804334	59	1.72075	0.0767341	62	1.81633	0.05195	58	1.60949	0.0514085	64	3.12772	0.0909351	63	2.09593	0.0983137	59
	LIVER	D11MIT258	2.16285	D11MIT258	D11MIT333				1.26553	0.0466185	63	1.4143	0.0466864	59	1.90072	0.0767341	62	2.43383	0.0804334	59	1.64477	0.0487965	68	1.77601	0.0551422	54	2.02613	0.0900433	65	3.20749	0.101508	57
	LIVER	D13MIT301	2.29347	D13MIT302	D13MIT84				1.57649	0.0587376	37	1.26212	0.0401171	85	2.90255	0.102629	36	1.96919	0.0657264	86	1.67813	0.0583222	32	1.77952	0.0392516	85	3.40328	0.110088	37	2.30493	0.0760472	84
	LIVER	D19MIT56	2.59598	D19MIT43	D19MIT28				1.50969	0.0412439	76	1.10035	0.055815	46	2.52355	0.0713701	74	1.7599	0.0879788	48	1.86599	0.0428163	69	1.58222	0.05065	48	2.96342	0.0836582	71	2.04943	0.0952746	50
	LIVER	DXMIT121	5.36639	DXMIT121	DXMIT186				1.25979	0.0358987	100	1.69775	0.0633446	30	1.94577	0.0593627	100	3.24878	0.110894	29	1.66322	0.0409634	101	2.22679	0.0814111	26	2.37264	0.0736842	100	3.7881	0.133064	29
SHADOW	LIVER	D4MIT175	2.6799	D4MIT153	D4MIT31	D19MIT56			1.16097	0.0546104	46	1.45047	0.0382809	84	1.7374	0.0858282	48	2.46169	0.0664099	81	1.591	0.0597623	47	1.87562	0.0463311	80	2.01443	0.101579	50	3.0122	0.0839917	79
	LIVER	D12MIT17	1.79378	D12MIT17	D12NDS2	ALL			1.44018	0.046538	67	1.26112	0.0482486	55	2.68389	0.0758144	66	1.69288	0.0819697	55	1.84949	0.0520822	65	1.69393	0.0582317	54	2.94702	0.0870139	71	2.33963	0.106239	52
	LIVER	D16MIT84	2.3171	D16MIT39	D16MIT5	D19MIT56			1.12135	0.0561186	39	1.44216	0.0380488	91	1.59237	0.0954101	39	2.46177	0.0628946	90	1.5547	0.0706542	36	1.86625	0.0424879	91	2.06405	0.127126	37	2.89894	0.0745727	92
	LIVER	D17MIT175	2.86947	D17MIT175	D17MIT10	D18MIT22			1.50733	0.0724861	35	1.29083	0.0444924	71	3.15897	0.116088	33	1.89457	0.0743257	74	1.86928	0.0649428	33	1.74348	0.044734	68	3.51419	0.118534	36	2.31888	0.086982	72
	LIVER	D18MIT22	2.2619	D18MIT197	D18MIT94	D17MIT175			1.39512	0.0442332	72	1.2447	0.049275	50	2.46382	0.0743816	69	1.67803	0.0826143	52	1.81269	0.0491444	71	1.546	0.0541998	51	2.93625	0.0915771	68	2.03921	0.0978226	54
GENUINE	NECWT	D1MIT387	4.26119	D1MIT11	D1MIT421				33.5528	0.813992	73	28.3511	0.967144	47	43.7366	0.862529	76	34.7601	1.10907	45	41.9878	0.671776	77	36.3557	0.939272	42	50.1542	0.720849	76	39.8371	1.02406	42
	NECWT	D3MIT167	2.38546	D3MIT60	D3MIT167				34.1737	1.17181	40	30.0873	0.788179	74	47.1642	1.26039	44	37.241	0.981292	68	41.7983	0.965117	39	37.9369	0.711556	75	49.9509	1.00321	43	44.0101	0.799343	70
	NECWT	D8MIT89	2.1501	D8MIT316	D8MIT13N				30.8991	0.784624	71	30.2492	1.14917	39	36.9413	0.945327	70	45.5572	1.29573	38	38.052	0.676578	69	42.4916	0.866826	40	42.6001	0.793935	66	50.8377	0.96982	40
	NECWT	D10MIT47N	5.48467	D10MIT178	D10MIT14				33.8506	0.929283	57	28.9838	0.813755	65	46.935	1.05016	59	34.5637	1.00838	61	42.0004	0.765957	58	37.2124	0.757972	64	52.0434	0.797144	63	41.37	0.875175	56
	NECWT	D16MIT84	4.01653	D16MIT39	D16MIT217				26.0339	1.0516	39	33.8329	0.712991	91	32.6736	1.25528	38	44.1737	0.819067	90	37.0675	1.01248	36	41.1489	0.608853	91	42.4231	1.11212	36	48.3101	0.652811	90
	NECWT	DXMIT186	3.12588	DXMIT121	DXMIT186				30.5215	0.679836	97	36.3011	1.58221	25	38.194	0.811721	94	52.2951	1.64124	26	39.1688	0.618401	94	42.224	1.26216	25	44.695	0.672085	94	52.5894	1.26202	26
SHADOW	NECWT	D1MIT282	2.95003	D1MIT178	D1MIT7	D1MIT387			32.5769	0.680148	100	25.9675	1.41739	22	42.2594	0.798156	99	32.6472	1.74421	21	40.9738	0.580258	100	33.3386	1.37568	22	48.1915	0.637457	98	38.9883	1.55068	21
	NECWT	D1MIT144	2.27441	D1MIT14	D1MIT507	D1MIT387	D10MIT47N		33.3399	0.873822	67	29.7774	0.905943	55	44.7932	0.98758	66	36.6954	1.07574	54	41.0175	0.724709	68	38.3654	0.854674	51	49.4788	0.749648	71	42.6111	0.941261	49
	NECWT	D2MIT311	2.46871	D2MIT50	D2MIT311	D1MIT387	D10MIT47N		32.4175	0.727328	93	29.642	1.25186	29	43.0617	0.830034	92	35.3837	1.49498	28	41.2606	0.602939	96	35.7077	1.26041	23	49.0607	0.6386	97	38.6102	1.37008	23
	NECWT	D7MIT46	3.37604	D7MIT109	D7NDS4	D1MIT387			31.6075	1.02278	47	31.02	0.762035	75	44.6892	1.19112	44	37.4355	0.916521	76	44.6813	0.823909	52	35.9571	0.712148	70	52.4889	0.939879	44	42.2589	0.772639	75
	NECWT	D9MIT19	3.45057	D9MIT201	D9MIT19	D10MIT47N			29.448	0.815975	64	33.3434	0.852802	66	35.2709	0.998217	59	45.8889	0.942044	69	38.6845	0.764733	62	41.0624	0.718662	65	42.6068	0.873283	53	50.334	0.72541	73
	NECWT	D11MIT117	3.07594	D11MIT4	D11MIT8	D16MIT84			33.8324	0.825263	73	27.9204	0.965038	49	44.3845	0.894257	76	35.4643	1.14986	45	41.0178	0.677307	74	37.1645	0.908985	43	48.7787	0.724703	74	42.0136	0.995225	44
	NECWT	D12MIT37	2.36367	D12MIT145	D12MIT153	ALL			30.1739	0.795139	72	33.4321	0.848739	58	38.8312	0.903518	73	43.4944	1.03995	55	38.2839	0.718275	67	42.5227	0.724392	60	43.651	0.765593	69	51.1693	0.814328	57
	NECWT	D12MIT8	3.14547	D12MIT133	D12NDS2	D1MIT387	D10MIT47N	DXMIT186	33.7681	0.941311	59	29.848	0.844715	63	46.1469	1.05831	58	36.5232	1.0019	62	41.299	0.760309	62	38.4506	0.801176	57	50.8059	0.797804	63	42.3083	0.867745	57
	NECWT	D13MIT60	1.95835	D13MIT207	D13MIT177	D3MIT167	DXMIT186		36.9664	1.36288	30	29.468	0.698128	92	49.6855	1.35688	35	37.5912	0.827802	86	38.2961	1.1022	27	39.9057	0.626323	90	48.0673	1.09182	34	45.3474	0.699024	84
	NECWT	D13MIT35	3.62634	D13MIT291	D13MIT35	D1MIT387	D10MIT47N		33.2504	0.817104	75	28.7934	0.980535	47	44.4921	0.894257	76	35.3028	1.14986	45	41.4633	0.668058	75	36.4963	0.924256	42	49.8341	0.710475	77	40.4305	1.01805	41
	NECWT	D17MIT175	3.32305	D17MIT175	D17MIT51	DXMIT186			34.788	1.33935	35	30.669	0.8221	71	50.9935	1.4774	33	37.8055	0.951702	73	42.1558	1.0895	33	39.1528	0.750469	68	52.7211	1.09286	34	44.3116	0.785827	71
	NECWT	D18MIT213	2.29398	D18MIT79	D18MIT213	DXMIT186			33.1571	1.10251	43	30.5951	0.696919	87	46.8382	1.19725	44	37.7352	0.836824	84	41.6769	0.878955	47	39.0537	0.650293	80	51.088	0.912327	47	44.3715	0.713954	79
GENUINE	TAIL	D1MIT387	3.80136	D1MIT11	D1MIT421				90.0153	0.625329	72	85.3275	0.746172	46	92.2405	0.498875	75	86.1245	0.637556	45	96.1571	0.921134	72	91.6706	1.23526	42	98.0456	0.952078	78	90.9817	1.3697	42
	TAIL	D6MIT25	2.67721	D6MIT25	D6MIT58				89.4909	0.554961	75	85.3065	0.788396	45	90.34	0.437525	72	87.4259	0.56811	47	96.073	0.8428	75	90.8913	1.22995	42	96.1513	0.965311	75	91.1479	1.32085	47
	TAIL	D7MIT71	4.37804	D7MIT105	D7NDS4				90.706	0.822362	34	86.5904	0.544657	86	92.7536	0.740846	31	87.9926	0.451698	88	99.1436	1.25526	35	91.7665	0.881992	82	99.8861	1.38504	36	92.7994	0.95639	85
	TAIL	D10MIT103	4.22308	D10MIT297	D10MIT103				88.4569	0.573669	79	86.1498	0.743121	41	90.8685	0.47593	80	86.0497	0.657829	39	95.6868	0.922186	75	89.8277	1.17124	42	97.7082	0.982726	82	88.6514	1.33858	39
SHADOW	TAIL	D1MIT20	2.77861	D1MIT373	D1MIT20	ALL			89.4686	0.509354	105	82.4539	1.07782	23	90.7771	0.41167	105	84.5349	0.909517	22	95.1095	0.76811	95	90.4228	1.70342	27	96.0024	0.802163	105	90.8077	1.96214	23
	TAIL	D1MIT282	2.73603	D1MIT178	D1MIT7	D1MIT387			88.8621	0.505958	98	82.9908	1.04628	22	90.5002	0.423525	98	84.3102	0.921334	21	94.8264	0.789434	95	89.3631	1.81341	22	95.8573	0.844465	100	90.0169	2.07311	21
	TAIL	D3MIT137	2.95269	D3MIT22	D3MIT266	ALL			86.187	0.60535	72	89.9392	0.687851	48	87.7099	0.5057	71	91.5906	0.595238	48	92.1542	0.985113	65	96.103	1.06369	52	91.9859	1.04708	73	98.7442	1.20834	48
	TAIL	D4MIT156	2.60533	D4MIT332	D4MIT249	ALL			86.4359	0.777033	50	89.1838	0.570656	78	87.3032	0.608524	50	90.9887	0.477022	77	91.9415	1.11491	46	95.6043	0.900415	76	91.0176	1.16706	51	97.4349	0.971405	77
	TAIL	D6MIT175	2.29698	D6MIT384	D6MIT96	D7MIT71			86.0726	0.632997	58	88.9234	0.624448	54	86.9956	0.483639	59	91.1462	0.513791	52	91.6207	1.02999	61	95.8922	1.02177	51	92.0164	1.17909	59	96.0004	1.14199	56
	TAIL	D6MIT15	2.09666	D6MIT57	D6MIT201	D6MIT25			89.8309	0.623259	64	86.4757	0.678233	64	90.8966	0.514929	65	88.3167	0.546525	62	96.2667	0.951829	62	92.1948	1.02957	60	97.4506	1.03534	63	92.6061	1.08103	65
	TAIL	D8MIT324	2.97456	D8MIT13N	D8MIT56	ALL			86.8173	0.615949	69	89.4893	0.684879	59	88.1052	0.532398	64	91.1081	0.529522	63	91.7282	0.986296	63	96.7333	0.996601	59	91.3007	1.08935	64	98.7561	1.02659	64
	TAIL	D9MIT8	2.75684	D9MIT262	D9MIT8	ALL			89.2243	0.567449	84	85.7971	0.783303	44	90.5944	0.451369	86	87.4337	0.676285	41	95.8985	0.826893	84	90.5618	1.31285	38	97.1405	0.881181	87	90.3818	1.40629	41
	TAIL	D10MIT130	3.58232	D10MIT130	D10MIT31	ALL			88.5822	0.628566	65	86.6695	0.652351	55	90.4527	0.462253	67	87.2568	0.522194	52	96.2052	0.952507	67	90.6929	1.03422	50	97.3814	1.05139	70	89.3027	1.16363	52
	TAIL	D10MIT150	3.7184	D10MIT230	D10MIT266	D10MIT103			89.6099	0.714503	53	85.5988	0.66573	55	91.1326	0.577805	54	86.8716	0.585046	52	96.6906	0.757531	54	91.1421	0.775843	55	99.2204	0.82746	57	90.9831	0.911041	52
	TAIL	D11MIT117	6.63125	D11MIT4	D11MIT285	ALL			90.5418	0.583965	72	84.311	0.685992	48	91.965	0.49959	75	85.0132	0.63847	45	96.0668	0.948721	69	90.177	1.2235	43	97.5447	0.962157	75	89.5938	1.31976	45
	TAIL	D12MIT239	3.31665	D12MIT116	D12MIT239	ALL			89.8537	0.7322	51	86.2962	0.65475	60	91.3038	0.503993	54	87.8051	0.503338	56	97.4346	1.05823	55	91.0267	1.09693	51	97.6622	1.18372	54	91.2697	1.23522	57
	TAIL	D13MIT57	2.49509	D13MIT207	D13MIT84	D6MIT25	D7MIT71	D10MIT103	90.4926	0.726463	38	86.5576	0.539177	74	91.9938	0.633956	37	87.3697	0.4428	75	96.4307	1.28023	33	92.2253	0.928934	74	95.8675	1.3259	40	92.379	1.02175	74
	TAIL	D15MIT252	3.08469	D15MIT13	D15NDS2	ALL			89.5777	0.69231	48	86.6434	0.609274	72	91.3392	0.534452	48	87.7312	0.455984	71	97.7089	1.06716	47	91.5278	0.936221	70	97.205	1.19331	49	92.1132	1.0365	73
	TAIL	D16MIT3	3.53842	D16MIT2	D16MIT84	ALL			86.847	0.603463	78	90.3305	0.704827	50	87.8551	0.479348	80	92.5259	0.603424	47	92.2093	0.911626	72	97.5999	1.08931	50	92.6276	0.952999	82	99.0298	1.20848	46
	TAIL	D18MIT36	3.05733	D18MIT36	D18MIT53	D1MIT387			90.683	0.92716	27	86.4814	0.487454	85	91.8043	0.70332	30	87.4455	0.425712	82	97.0915	1.48095	27	91.9609	0.879909	80	97.5334	1.43422	35	91.7127	0.998062	79
	TAIL	D18MIT79	3.46913	D18MIT33	D18MIT80	D1MIT387			89.2494	0.932064	29	86.5124	0.507756	83	92.3577	0.697523	28	87.3411	0.408518	83	97.6926	1.31311	37	91.7548	0.882571	75	99.3165	1.49698	33	91.4867	1.00035	82
	TAIL	D19MIT90	6.96355	D19MIT106	D19MIT90	D1MIT387			91.1083	0.689252	41	85.7783	0.562604	71	92.2117	0.580479	42	86.7349	0.466319	70	98.0259	1.15876	44	90.8718	0.987248	63	98.5373	1.26305	44	90.5082	1.06945	70
GENUINE	SPLEEN	D3MIT45	2.19347	D3MIT86	D3MIT128				0.133855	0.00657151	48	0.100981	0.00475405	82	0.175065	0.0064688	52	0.147233	0.0052373	77	0.152881	0.0083181	45	0.117232	0.00586503	82	0.202233	0.00812505	49	0.161698	0.00613016	80
	SPLEEN	D8MIT58	2.97536	D8MIT58	D8MIT256				0.112618	0.00485008	98	0.153036	0.0116759	15	0.150517	0.00506306	96	0.235347	0.0116845	17	0.127039	0.00601818	91	0.178393	0.0137252	15	0.17543	0.00616618	94	0.241	0.0145599	16
	SPLEEN	D12MIT239	5.92968	D12MIT35	D12MIT6				0.135832	0.00671406	52	0.105595	0.00598639	61	0.20299	0.00650847	54	0.123736	0.006403	58	0.160475	0.00779687	56	0.111526	0.00811968	52	0.221983	0.00768562	55	0.143861	0.00806797	57
	SPLEEN	D15MIT43	3.20759	D15MIT2	D15MIT42				0.100012	0.00596233	56	0.134155	0.00583053	66	0.136652	0.00618134	56	0.185342	0.00579905	65	0.117948	0.00747941	59	0.151046	0.00717106	60	0.151143	0.00794831	54	0.206614	0.00664075	69
	SPLEEN	DXMIT121	2.05864	DXMIT121	DXMIT121				0.11332	0.0044757	100	0.124222	0.00789755	30	0.150479	0.00461709	100	0.198109	0.00862511	29	0.129055	0.00549513	101	0.149179	0.0109211	26	0.165246	0.00562624	100	0.240905	0.0101602	29
SHADOW	SPLEEN	D1MIT322	4.06476	D1MIT322	D1MIT478	D3MIT45			0.10325	0.00471093	92	0.142014	0.00710322	38	0.148234	0.00483657	92	0.183996	0.00759398	37	0.122823	0.00566205	90	0.154841	0.00958649	37	0.15329	0.00571054	92	0.236943	0.00965993	37
	SPLEEN	D1MIT541	3.09217	D1MIT113	D1MIT115	D15MIT43			0.127407	0.00512687	83	0.09985	0.00718088	39	0.182121	0.00513498	82	0.123619	0.00745033	39	0.147266	0.00627353	78	0.11227	0.00915764	41	0.200291	0.0059753	86	0.1416	0.00969032	37
	SPLEEN	D1MIT155	3.21914	D1MIT273	D1MIT155	ALL			0.134762	0.00682332	47	0.103725	0.00476514	83	0.191422	0.00660557	51	0.140202	0.00519749	78	0.160167	0.0082431	44	0.116426	0.00610777	83	0.209063	0.00758216	53	0.161653	0.00648775	76
	SPLEEN	D4MIT190	2.12545	D4MIT13	D4MIT256	ALL			0.131181	0.00803839	34	0.108174	0.00438945	96	0.195483	0.0078238	36	0.143012	0.00476028	93	0.151141	0.00967473	39	0.124505	0.00563096	88	0.209133	0.00949255	40	0.165931	0.00576824	89
	SPLEEN	D5MIT387	3.45656	D5MIT349	D5MIT352	ALL			0.104114	0.00482922	89	0.140114	0.00670776	41	0.147422	0.00493554	90	0.185782	0.00727925	39	0.121134	0.00593312	91	0.158557	0.00875719	36	0.158131	0.00599541	91	0.226293	0.00878488	38
	SPLEEN	D5MIT356	4.13814	D5MIT356	D5MIT308	D12MIT239			0.105425	0.00513792	79	0.131929	0.0060252	51	0.139575	0.00518798	82	0.192467	0.0066263	47	0.121443	0.00641931	76	0.151804	0.00755697	51	0.151869	0.00641512	80	0.225369	0.00775191	49
	SPLEEN	D6MIT268	2.67168	D6MIT116	D6MIT223	D12MIT239			0.123882	0.00541644	73	0.088125	0.00707529	39	0.167021	0.00552468	74	0.129103	0.00745562	40	0.138607	0.00631833	76	0.10767	0.00832153	38	0.186594	0.00635726	73	0.131375	0.00809932	41
	SPLEEN	D6MIT113	2.38777	D6MIT339	D6MIT201	D12MIT239			0.128308	0.00571468	56	0.105296	0.00538231	74	0.178098	0.0060268	57	0.144874	0.0055471	72	0.154898	0.00698392	58	0.115663	0.00683731	69	0.204316	0.00720589	57	0.160077	0.00678995	72
	SPLEEN	D7MIT227	2.81676	D7MIT227	D7MIT26	ALL			0.127165	0.00534061	76	0.100333	0.00652808	46	0.174262	0.00538287	74	0.139338	0.00671405	47	0.147571	0.00651061	79	0.11166	0.00846988	40	0.201763	0.00649292	78	0.138656	0.0082515	45
	SPLEEN	D10MIT67	4.08587	D10MIT230	D10MIT14	D12MIT239			0.13504	0.00593663	62	0.099	0.00582397	60	0.183799	0.0059412	60	0.138416	0.00600243	61	0.15488	0.00692485	65	0.113567	0.00777654	54	0.212204	0.00682792	64	0.144754	0.0077384	59
	SPLEEN	D11MIT71	2.333	D11MIT71	D11MIT79	ALL			0.124363	0.00492107	85	0.0955667	0.00637647	45	0.170867	0.00501318	87	0.134202	0.00701777	42	0.142526	0.00619373	82	0.111494	0.00783532	45	0.193787	0.00613092	86	0.14785	0.00831993	43
	SPLEEN	D13MIT60	2.59647	D13MIT60	D13MIT64	ALL			0.13881	0.00902137	30	0.10778	0.00462114	92	0.216443	0.00830451	35	0.142123	0.00504197	87	0.162946	0.0102595	27	0.123588	0.00582994	90	0.207167	0.0097596	34	0.173499	0.00617216	87
	SPLEEN	D14MIT225	4.36801	D14MIT212	D14MIT219	D12MIT239			0.131415	0.00609277	57	0.0924286	0.005397	65	0.176589	0.0061539	58	0.130763	0.00585718	63	0.146436	0.00708012	62	0.109681	0.00662891	60	0.198521	0.00728165	58	0.139575	0.00664066	64
	SPLEEN	D16MIT84	2.85614	D16MIT39	D16MIT217	D12MIT239			0.0931	0.00699665	39	0.125484	0.00474377	91	0.125278	0.00742078	39	0.174924	0.0048918	90	0.10875	0.00947807	36	0.143773	0.00569964	91	0.142056	0.00970683	37	0.196421	0.00569408	92
	SPLEEN	D19MIT43	3.88115	D19MIT43	D19MIT56	ALL			0.127776	0.00516551	76	0.0968056	0.00699044	46	0.178477	0.00555505	74	0.133002	0.00692539	47	0.147888	0.00682447	69	0.111822	0.00774944	52	0.211913	0.00689681	71	0.140986	0.00792588	49
GENUINE	HEART	D1MIT507	2.12036	D1MIT269	D1MIT507				0.155539	0.00489765	49	0.142	0.00392424	65	0.171445	0.00447127	52	0.15415	0.00400597	62	0.199737	0.00482876	50	0.187528	0.00443809	59	0.215061	0.00460222	58	0.195948	0.00479962	57
	HEART	D7MIT23	2.87474	D7MIT23	D7MIT346				0.153639	0.00460258	51	0.14297	0.00365768	71	0.167259	0.00443876	51	0.155489	0.00374937	70	0.20654	0.00492995	53	0.181358	0.00395976	66	0.214787	0.0050395	52	0.192899	0.00406483	71
	HEART	D10MIT47N	4.00967	D10MIT178	D10MIT237				0.154783	0.00451708	57	0.139469	0.00395552	65	0.17242	0.00434941	59	0.15066	0.00414937	62	0.200728	0.00425233	58	0.178631	0.004208	64	0.214977	0.00445858	63	0.191631	0.00482035	59
	HEART	D12MIT6	3.07854	D12MIT6	D12MIT133				0.156918	0.00406884	72	0.132458	0.00473219	49	0.164343	0.00388394	74	0.152606	0.00488384	46	0.199993	0.00390837	72	0.172064	0.00514137	44	0.199926	0.00418489	74	0.197769	0.00573277	44
	HEART	D15NDS2	2.87141	D15MIT13	D15MIT203				0.14503	0.00436602	49	0.149895	0.0038618	73	0.145893	0.0043801	50	0.171041	0.00380782	71	0.188547	0.00467312	49	0.196152	0.00416963	70	0.185496	0.00488189	49	0.214858	0.00422209	74
SHADOW	HEART	D1MIT155	3.11842	D1MIT463	D1MIT155	D10MIT47N			0.163456	0.00503956	47	0.13785	0.00351943	83	0.16951	0.00468503	51	0.154766	0.00368634	78	0.199678	0.0050228	44	0.185608	0.00372167	83	0.213098	0.00489387	53	0.195644	0.00418749	76
	HEART	D3MIT101	2.45691	D3MIT101	D3MIT12	D1MIT507			0.1491	0.00404081	71	0.145333	0.00411656	59	0.167408	0.00385984	75	0.151151	0.00438533	54	0.197679	0.00414575	70	0.182147	0.00428844	57	0.213097	0.00425404	77	0.188167	0.00484422	52
	HEART	D9MIT19	2.2568	D9MIT19	D9MIT19	D10MIT47N			0.143583	0.00400972	64	0.151321	0.00419068	66	0.152042	0.00420188	60	0.168549	0.00399046	69	0.18501	0.00436215	62	0.196758	0.00409935	65	0.191021	0.00491392	55	0.213359	0.00408947	74
	HEART	D13MIT151	2.81162	D13MIT151	D13MIT35	D10MIT47N	D15NDS2		0.153891	0.00448137	57	0.141714	0.0042017	57	0.173262	0.00414931	60	0.149862	0.00429322	54	0.198633	0.00451648	54	0.186888	0.00473902	55	0.216267	0.00437505	64	0.192012	0.00514863	51
GENUINE	KIDNEY	D2MIT354	2.65385	D2MIT1	D2MIT119				0.328344	0.00683087	69	0.358264	0.00742633	52	0.360545	0.00803323	67	0.395615	0.00898693	53	0.572603	0.0130303	71	0.666672	0.0150788	45	0.570716	0.0115204	72	0.616637	0.0138602	46
	KIDNEY	D5MIT387	5.979	D5MIT349	D5MIT233				0.308482	0.00591472	89	0.397386	0.00821551	41	0.352406	0.00679293	90	0.412202	0.0100187	39	0.572008	0.0110619	91	0.685729	0.0163272	36	0.574277	0.00999389	91	0.619481	0.0146437	38
	KIDNEY	D11MIT263	2.02711	D11MIT41	D11MIT359				0.355802	0.0071566	62	0.322609	0.00712434	59	0.392362	0.00827932	62	0.354242	0.00874546	58	0.64788	0.0131558	65	0.567202	0.0148883	51	0.601311	0.0120443	60	0.575111	0.013079	58
	KIDNEY	D13MIT193	2.92146	D13MIT103	D13MIT193				0.36572	0.00644902	67	0.308317	0.00743646	55	0.390552	0.00785803	66	0.352759	0.00849601	55	0.640503	0.0136846	58	0.580065	0.0133308	61	0.613926	0.0119548	63	0.559006	0.0114846	60
	KIDNEY	D14MIT225	3.97349	D14MIT225	D14MIT225				0.369324	0.007366	57	0.297413	0.00652483	65	0.395776	0.00832642	58	0.340895	0.00792495	63	0.636916	0.0137411	62	0.558772	0.0128654	60	0.607116	0.0126901	58	0.567197	0.011573	64
	KIDNEY	D17MIT46	3.8214	D17MIT245	D17MIT198				0.373069	0.0085435	45	0.310341	0.00621004	77	0.402905	0.00967372	43	0.346196	0.0072324	79	0.65894	0.0158061	40	0.569121	0.0119505	77	0.615456	0.014032	40	0.566718	0.0105971	81
SHADOW	KIDNEY	D1MIT10	2.86302	D1MIT10	D1MIT416	D5MIT387			0.308778	0.00649555	77	0.375414	0.00805168	45	0.357381	0.00738328	76	0.386126	0.00941378	46	0.569887	0.0117118	75	0.657791	0.0162032	42	0.573531	0.0102939	77	0.605237	0.0145309	44
	KIDNEY	D1MIT273	3.32187	D1MIT273	D1MIT273	D5MIT387			0.365176	0.00752837	57	0.310031	0.00659244	65	0.396392	0.00843519	58	0.347216	0.00793335	63	0.636702	0.0138531	54	0.568727	0.0129851	68	0.620492	0.0120911	60	0.560483	0.0123147	62
	KIDNEY	D2MIT110	6.00292	D2MIT194	D2MIT409	D5MIT387	D17MIT46		0.312362	0.00594869	88	0.38885	0.00809592	42	0.352319	0.0067176	92	0.412393	0.0102616	37	0.568712	0.0111483	89	0.692979	0.0160404	38	0.573981	0.00991174	93	0.620131	0.0149115	36
	KIDNEY	D3MIT106	5.17788	D3MIT49	D3MIT106	D5MIT387	D17MIT46		0.307702	0.00624879	76	0.377028	0.0084797	46	0.342662	0.00727865	78	0.408206	0.00959536	44	0.561532	0.012113	74	0.670323	0.0155252	43	0.565718	0.0108951	77	0.616956	0.0135087	44
	KIDNEY	D6MIT113	5.05591	D6MIT25	D6MIT57	D5MIT387	D14MIT225	D17MIT46	0.368319	0.00699921	56	0.311333	0.00659213	74	0.398943	0.00829487	57	0.349431	0.00763465	72	0.672472	0.0130211	58	0.557047	0.0127477	69	0.613655	0.0120117	57	0.568762	0.0113183	72
	KIDNEY	D7MIT17	3.35306	D7MIT90	D7MIT281	ALL			0.351653	0.0058316	90	0.302411	0.00849822	40	0.389963	0.00669958	91	0.329578	0.0103184	38	0.634734	0.0107988	86	0.54773	0.0171586	41	0.602287	0.00957735	90	0.557859	0.0159341	39
	KIDNEY	D8MIT58	2.54409	D8MIT58	D8MIT58	ALL			0.326729	0.00578792	98	0.417589	0.0139336	15	0.364977	0.00679902	96	0.417292	0.0156907	17	0.592714	0.0113135	91	0.697946	0.0258018	15	0.580307	0.00992994	94	0.625667	0.023447	16
	KIDNEY	D10MIT67	2.0965	D10MIT230	D10MIT133	D14MIT225	D17MIT46		0.358074	0.00695148	62	0.317056	0.00681956	60	0.397888	0.00810449	60	0.344375	0.00818802	61	0.633919	0.0128257	65	0.58759	0.0144032	54	0.606863	0.0110891	64	0.567078	0.0125678	59
	KIDNEY	D12MIT6	4.41198	D12MIT158	D12MIT6	D5MIT387	D14MIT225		0.362353	0.00666708	72	0.30725	0.00775402	49	0.399006	0.00767987	74	0.337922	0.009657	46	0.65261	0.0123732	72	0.54666	0.0162766	44	0.610267	0.010905	74	0.55731	0.0149384	44
	KIDNEY	D16MIT39	5.91892	D16MIT4	D16MIT27	ALL			0.292211	0.00856934	39	0.356289	0.00581006	91	0.316744	0.0102134	39	0.395796	0.00673273	90	0.536038	0.0176712	36	0.640049	0.0106266	91	0.539109	0.0161805	37	0.61081	0.0094916	92
	KIDNEY	D19MIT56	3.16252	D19MIT43	D19MIT56	ALL			0.359085	0.00625651	76	0.299954	0.00846688	46	0.386879	0.00748645	74	0.34188	0.00922864	48	0.634092	0.0125104	69	0.561484	0.0147993	48	0.606517	0.0112582	71	0.555757	0.0128214	50
	KIDNEY	DXMIT64	2.82965	DXMIT163	DXMIT10	D17MIT46			0.359822	0.00682664	66	0.299681	0.0070391	56	0.386993	0.00784454	65	0.344923	0.00838322	56	0.619333	0.0129317	67	0.572122	0.0135904	55	0.611818	0.0119649	65	0.553491	0.012103	57
GENUINE	INSULIN	DXMIT121	3.83535	DXMIT121	DXMIT186				1.19614	0.261643	91	4.26233	0.440391	30	3.1738	0.345409	91	6.63429	0.594397	29	4.08773	0.540515	99	8.78936	1.0776	26	6.5295	0.556676	97	9.85832	0.989013	29
	INSULIN	D1MIT282	1.36	D1MIT74	D1MIT7				2.00041	0.268943	92	0.997315	0.568465	21	4.47162	0.344702	93	1.58095	0.813383	19	4.85107	0.519091	98	2.91859	1.2354	22	7.7972	0.533252	98	4.26595	1.2874	21
	INSULIN	D1MIT511	1.97947	D1MIT291	D1MIT155				2.96987	0.436359	39	1.21475	0.292638	74	6.22709	0.529748	42	2.72668	0.400606	70	2.60582	0.816174	40	5.39395	0.599032	80	6.08406	0.812994	44	7.59439	0.627216	75
	INSULIN	D19MIT28	1.8	D19MIT56	D19MIT16				2.34552	0.325935	65	1.23155	0.413975	42	4.48588	0.447456	63	3.48254	0.513323	43	5.53115	0.667547	63	2.52656	0.735679	48	8.36637	0.70234	64	4.63316	0.780104	48
SHADOW	INSULIN	D17MIT11	2.08555	D17MIT16	D17MIT51	DXMIT121			2.73546	0.435352	42	1.38625	0.318759	65	6.12295	0.568185	39	2.9075	0.419126	67	5.0784	0.803978	41	3.77962	0.627007	70	9.25073	0.826978	43	5.38625	0.670185	69
GENUINE	LEPTIN	D1MIT419	2.76715	D1MIT48	D1MIT103				20.4811	2.19618	54	12.0081	3.21155	20	37.4342	1.72679	55	20.6619	2.6705	23	27.1591	1.34188	74	13.5417	2.96185	20	35.905	1.40155	75	20.6165	2.86278	20
	LEPTIN	D8MIT89	3.41973	D8MIT89	D8MIT89				16.4945	2.50906	35	16.7282	2.5806	29	25.6346	1.89285	45	42.9935	2.40317	24	19.7967	1.71419	50	28.6386	1.51827	35	24.7722	1.75717	55	42.1012	2.26144	30
	LEPTIN	D18MIT213	2.62	D18MIT213	D18MIT213				23.6584	2.7395	29	16.2702	2.28615	49	47.2421	2.57631	27	26.1649	1.57021	58	26.4228	1.59372	39	22.8679	1.59128	60	38.8353	1.96479	38	28.6265	1.51757	63
	LEPTIN	DXMIT186	3.82751	DXMIT121	DXMIT186				17.0498	1.86247	62	29.7292	3.84272	15	27.759	1.51022	65	57.397	3.61211	16	22.9688	1.50956	72	29.7562	2.27459	21	29.7443	1.41889	73	39.8433	2.63902	22
SHADOW	LEPTIN	D1MIT282	2.22258	D1MIT178	D1MIT7	D1MIT419			20.0367	2.07489	59	10.9615	3.78137	15	36.3345	1.62147	63	19.4701	3.27113	15	26.3829	1.26522	81	12.107	3.76723	13	34.9912	1.37536	79	19.1754	3.27309	16
	LEPTIN	D2MIT226	2.09314	D2MIT50	D2MIT311	D1MIT419			22.3263	2.01806	55	14.1043	3.00097	22	40.2182	1.76677	52	20.6234	2.31264	29	26.1594	1.44731	69	20.6599	2.57089	24	34.6715	1.41736	71	25.9493	2.46329	24
	LEPTIN	D5MIT47	2.55894	D5MIT47	D5MIT61	D1MIT419	D8MIT89	DXMIT186	22.473	2.42566	37	17.6608	2.27868	40	42.8684	2.3316	32	27.5654	1.75734	49	30.8674	1.51478	44	19.9655	1.89901	49	38.3758	1.86998	41	27.3563	1.67295	54
	LEPTIN	D6MIT15	2.08658	D6MIT339	D6MIT201	ALL			16.84	2.74751	35	20.3181	2.29435	43	26.1721	1.70532	48	39.3309	2.08472	37	19.7252	1.66181	50	28.2323	1.73722	49	26.4298	1.66889	52	37.2037	1.75411	49
	LEPTIN	D7MIT105	2.74241	D7MIT238	D7MIT105	D1MIT419	D8MIT89		23.3385	2.26116	42	13.7444	2.78978	32	42.017	1.99305	39	25.0381	2.09263	39	25.7312	1.38536	49	21.5998	2.03177	45	39.7443	1.75844	48	24.9014	1.84263	47
	LEPTIN	D9MIT19	2.0631	D9MIT201	D9MIT19	ALL			14.2797	2.75702	34	22.8784	2.28292	44	23.0977	2.00021	40	42.4052	1.8037	45	23.711	1.72303	49	24.2465	1.67652	50	28.14	1.81552	45	35.4935	1.60188	56
	LEPTIN	D13MIT115	2.19857	D13MIT207	D13MIT60	ALL			30.277	3.03376	26	14.9933	2.39446	46	42.7415	2.53411	24	30.2813	1.70272	55	24.7271	1.7162	29	22.9402	1.56922	62	39.4655	2.15546	31	28.6249	1.57548	63
	LEPTIN	D16MIT217	2.25067	D16MIT188	D16MIT217	ALL			11.5356	3.40821	28	24.1101	2.33812	40	23.371	2.37082	28	41.7793	2.02884	44	20.0489	2.55	27	25.0266	1.24777	59	25.7472	2.23668	33	35.8258	1.71663	55
	LEPTIN	D17MIT11	3.46642	D17MIT175	D17MIT51	DXMIT186			24.7216	2.73441	31	15.3874	2.6785	37	47.4494	2.71141	26	26.3571	1.86584	46	30.5588	1.62373	36	18.6347	1.81836	50	38.7847	2.17407	34	27.4629	1.75869	54
GENUINE	CHOL	D1MIT187	5.1475	D1MIT306	D1MIT419				139.043	4.96988	70	95.3367	5.94955	46	213.995	5.50908	73	129.523	7.35493	43	158.219	4.81403	76	106.151	6.81828	42	203.31	5.80414	77	152.773	8.2005	42
	CHOL	D1MIT144	3.92468	D1MIT14	D1MIT507				135.425	5.2058	64	101.135	5.41547	54	210.03	6.08431	64	134.306	6.85468	52	155.8	5.25313	68	114.653	6.3375	50	209.301	6.17677	72	161.427	7.70536	49
	CHOL	D3MIT267	3.3388	D3MIT60	D3MIT267				135.628	6.02074	48	110.935	4.45936	77	228.553	7.02562	48	149.242	5.56673	75	156.128	6.22929	46	129.391	4.93301	80	215.948	7.38247	51	170.63	6.11023	76
	CHOL	D12MIT219	2.2175	D12MIT145	D12MIT112				105.916	4.86835	68	143.993	5.06479	57	163.122	5.87885	68	205.418	6.27981	55	130.463	5.26795	67	154.342	5.41418	59	175.828	6.41815	68	207.285	6.61701	59
	CHOL	D13MIT177	2.23163	D13MIT207	D13MIT177				134.379	7.09406	36	111.946	4.37415	82	211.913	7.9938	39	156.082	5.5444	77	159.252	6.98047	37	125.271	5.01593	81	216.368	8.42575	40	172.256	5.98012	81
	CHOL	D15MIT243	2.05324	D15MIT243	D15MIT243				104.21	5.94934	44	136.009	5.03478	66	139.349	7.70178	43	208.204	6.08936	65	124.356	6.69625	47	150.118	5.41398	66	179.176	8.44248	43	199.881	6.35786	71
	CHOL	D17MIT175	6.25408	D17MIT175	D17MIT51				151.402	7.76166	34	106.745	4.82112	70	252.603	9.145	32	146.232	5.96656	71	173.777	7.63905	34	120.186	5.52397	67	229.133	8.72345	35	164.58	6.18794	72
	CHOL	DXMIT186	6.75448	DXMIT186	DXMIT186				107.121	4.08909	93	168.634	9.21161	25	147.551	5.07294	91	283.257	10.3589	25	126.972	4.59365	92	175.103	8.7908	26	178.619	5.50824	94	220.325	10.4454	27
SHADOW	CHOL	D1MIT161	2.10868	D1MIT74	D1MIT484S	ALL			135.476	4.83402	73	95.3445	5.95976	45	195.597	5.67282	73	143.336	7.57354	43	150.707	4.9557	76	115.434	6.96192	42	195.775	6.01719	76	173.737	8.19601	45
	CHOL	D2MIT311	2.57517	D2MIT412	D2MIT311	D1MIT187	D1MIT144		129.996	4.30994	90	90.3499	7.59857	28	193.394	5.04651	91	123.264	9.96876	25	147.955	4.40485	95	105.365	9.30864	23	199.07	5.25256	98	153.656	11.2158	23
	CHOL	D3MIT85	3.30337	D3MIT85	D3MIT128	D1MIT144	D3MIT267		103.815	5.45526	56	136.575	4.65854	69	156.255	6.51025	58	201.711	5.81385	65	119.387	5.88144	56	159.447	5.02581	70	161.805	7.07596	58	213.444	6.23885	69
	CHOL	D5MIT47	3.44464	D5MIT47	D5MIT352	D1MIT144	D17MIT175	DXMIT186	133.94	6.09759	49	109.746	4.75701	69	212.325	7.19692	47	149.604	5.8867	69	163.128	6.05618	51	118.911	5.45888	67	220.112	7.43172	50	164.859	6.44322	71
	CHOL	D7MIT21	2.36228	D7MIT21	D7MIT154	D1MIT144			105.815	5.61076	56	138.512	5.28908	56	153.703	6.81472	55	206.778	6.4607	55	121.786	6.04221	51	147.414	5.45136	58	164.605	6.92812	53	204.894	6.16169	61
	CHOL	D9MIT289	4.13267	D9MIT207	D9MIT289	D17MIT175			107.039	4.8212	70	142.121	5.18857	55	152.765	5.79703	71	222.68	6.48767	52	128.452	5.1232	73	157.693	5.78718	53	168.544	6.29527	72	219.425	6.93717	55
	CHOL	D12MIT8	3.87709	D12MIT231	D12NDS2	D1MIT187	D1MIT144	D3MIT267	136.634	5.62367	56	104.364	5.03395	62	213.477	6.54979	56	140.755	6.33624	60	160.839	5.49155	62	115.387	5.93775	56	211.396	6.63499	63	165.579	7.06431	58
	CHOL	D13MIT35	4.28892	D13MIT151	D13MIT35	D1MIT187	D1MIT144	D17MIT175	138.336	4.83137	73	94.0553	5.90844	46	214.281	5.65491	74	130.851	7.6244	43	155.339	4.77495	76	107.071	6.77884	41	197.456	5.53966	79	161.113	7.95782	41
	CHOL	D18MIT213	3.42784	D18MIT80	D18MIT213	DXMIT186			150.181	6.52195	43	106.565	4.29315	82	239.803	7.51369	43	151.338	5.35083	80	154.961	6.30774	47	132.352	4.84104	79	204.631	7.61578	48	179.894	5.92342	79
GENUINE	FFA	D5MIT59	2.72068	D5MIT215	D5MIT43				0.696936	0.0668071	32	0.895824	0.0356871	93	0.808344	0.0775882	30	1.05555	0.0411543	93	0.769285	0.0572597	41	0.798594	0.0350209	85	0.82123	0.0609943	36	0.98812	0.0350836	91
	FFA	D6MIT109	2.78071	D6MIT150	D6MIT109				0.907928	0.0428044	66	0.740549	0.059034	44	1.03875	0.0480578	65	0.854714	0.0661314	43	0.847709	0.0386688	67	0.748785	0.0511602	46	1.03514	0.0411001	69	0.832714	0.055451	45
	FFA	D9MIT207	3.05548	D9MIT228	D9MIT289				0.767747	0.0462134	62	0.918432	0.0434932	63	0.904923	0.0524903	64	1.07264	0.0519536	59	0.712415	0.0420817	66	0.888462	0.0421195	60	0.885818	0.0431005	66	1.00044	0.0432061	61
	FFA	D14MIT5	3.23822	D14MIT260	D14MIT225				0.784613	0.0491382	55	0.884949	0.0434232	62	0.875063	0.0563438	53	1.09818	0.0496136	62	0.727387	0.0446473	61	0.906687	0.042102	60	0.881207	0.0472013	56	1.02026	0.0421972	64
SHADOW	FFA	D4MIT256	2.31658	D4MIT14	D4MIT256	D14MIT5			0.825955	0.0481195	58	0.8377	0.0448885	59	0.903348	0.0552005	56	1.06586	0.0512648	59	0.722189	0.0442818	63	0.912628	0.042603	58	0.875023	0.0462564	60	1.02733	0.0435424	60
	FFA	D7MIT227	2.11326	D7MIT55	D7MIT346	D9MIT207			0.752801	0.0440065	72	1.00918	0.0520237	46	0.910461	0.0499435	70	1.05974	0.0591115	46	0.776376	0.0377402	79	0.795136	0.0500768	39	0.906733	0.0407747	76	0.998819	0.0509281	45
	FFA	D10MIT198	2.41615	D10MIT31	D10MIT158	D5MIT59	D9MIT207		0.673932	0.0682804	29	0.906281	0.0351063	96	0.807126	0.0770399	31	1.0561	0.0413666	92	0.742317	0.0589299	36	0.810853	0.0344437	90	0.892682	0.0609943	36	0.955642	0.0350836	91
	FFA	D11MIT295	3.24298	D11MIT62	D11MIT79	D14MIT5			0.777364	0.0436205	75	0.960055	0.0533085	43	0.924189	0.048916	76	1.03228	0.0624539	40	0.725029	0.0381671	76	0.897829	0.0487654	42	0.866704	0.0406718	77	1.07888	0.0512562	44
GENUINE	TRIG	D3MIT12	1.84645	D3MIT101	D3MIT106				65.8121	4.69782	67	79.719	4.71171	55	84.2527	11.4765	70	113.803	11.7541	51	71.4696	5.26226	64	70.9182	5.54611	53	79.5048	7.93461	75	102.783	9.04215	50
	TRIG	D5MIT308	3.15669	D5MIT387	D5MIT165				63.8426	4.33056	74	87.2555	5.35906	40	85.1762	11.4004	73	122.014	13.8559	39	69.6875	4.84048	77	72.4409	6.98124	33	79.1161	7.69401	79	115.045	10.332	39
	TRIG	D11MIT79	4.99025	D11MIT71	D11MIT173				70.0325	4.58737	72	81.3708	5.4214	43	80.3488	11.2046	74	131.608	13.5402	40	66.3776	4.97649	68	81.746	6.1617	41	74.5528	7.82923	75	116.701	9.73205	44
	TRIG	D13MIT135	2.03464	D13MIT207	D13MIT84				75.6832	5.82441	37	71.4047	4.22185	79	127.349	14.1719	38	90.0094	10.6868	77	79.9416	7.30761	32	69.0484	4.97942	76	109.086	10.2606	40	84.1173	7.71552	78
SHADOW	TRIG	D1MIT296	1.78055	D1MIT296	D1MIT20	ALL			69.8781	4.3196	72	70.84	5.67447	42	108.416	10.4064	74	76.2937	15.3917	40	74.6264	4.89522	69	67.789	6.73315	42	104.363	7.77688	75	71.4824	10.6459	43
	TRIG	D1MIT14	2.98895	D1MIT196	D1MIT14	D13MIT135			75.9367	5.1798	56	73.3523	5.23923	53	115.165	12.2006	57	85.7108	13.8676	51	77.0434	5.80873	50	67.5497	6.19054	50	114.627	8.67302	60	64.7505	9.67036	52
	TRIG	D2MIT22	2.14894	D2MIT110	D2MIT409	D3MIT12			65.3661	3.9898	89	91.4872	6.03729	33	86.8871	9.7152	92	128.063	15.5056	29	71.8812	4.38187	91	69.2699	7.84735	26	85.2281	6.83276	98	103.072	12.204	27
	TRIG	D6MIT109	3.51268	D6MIT150	D6MIT25	D5MIT308			82.3371	4.44782	66	60.2956	6.44453	41	119.745	11.0537	64	70.4604	16.2471	42	77.6946	5.05907	62	68.3664	6.59232	42	101.77	7.9255	69	74.4094	10.7894	44
	TRIG	D7MIT23	3.13136	D7MIT190	D7MIT26	D13MIT135			66.9191	5.70007	48	79.8433	4.41437	67	81.9431	14.2756	46	110.991	10.5712	68	63.5506	6.09255	48	78.4566	5.01073	61	67.8282	9.71171	50	106.78	7.78216	69
	TRIG	D8MIT58	2.32655	D8MIT58	D8MIT58	ALL			68.6704	4.03742	92	103.121	9.21469	15	98.4737	10.337	90	110.024	22.2257	16	71.6613	4.83136	84	78.0694	11.1874	14	83.4959	7.48564	91	144.607	17.3026	16
	TRIG	D8MIT56	2.27353	D8MIT324	D8MIT56	ALL			79.841	4.59219	66	63.9517	4.88267	56	111.158	12.1813	61	83.204	11.1395	60	77.9346	5.54726	58	64.5221	5.27494	59	99.268	8.48448	65	80.1101	8.38408	60
	TRIG	D9MIT207	2.60291	D9MIT254	D9MIT106	ALL			70.3806	4.84865	60	73.8453	4.45195	62	83.3167	11.8718	62	115.007	11.086	59	66.5656	5.40131	60	77.2233	5.32056	57	74.0809	8.40754	64	109.757	8.30569	61
	TRIG	D10MIT31	3.64781	D10MIT282	D10MIT65	D11MIT79			66.5568	4.50074	71	80.7957	4.85849	51	82.4747	11.0324	73	121.692	12.0956	48	65.9087	5.05688	68	80.0944	5.75666	49	78.1668	7.8424	75	108.893	9.06082	50
	TRIG	D15MIT203	2.20438	D15MIT203	D15MIT231	ALL			86.7849	6.29071	31	66.9335	3.94605	91	105.266	15.394	30	94.486	9.73489	91	79.7894	7.1083	32	68.3747	4.51984	85	119.266	11.357	32	79.8301	6.99314	93
	TRIG	D18MIT172	2.52122	D18MIT197	D18MIT22	D11MIT79			61.9709	4.8239	65	84.3157	5.02963	49	90.3331	12.347	62	110.182	12.0877	51	69.8341	5.27753	65	78.3993	5.92441	47	78.0274	8.52244	66	110.727	9.05227	53
	TRIG	DXMIT187	2.27256	DXMIT55	DXMIT163	ALL			69.2743	4.30679	81	86.2905	6.09729	34	92.6409	10.5581	82	110.619	15.1027	32	69.0197	4.70373	75	78.3224	6.84006	34	77.6075	7.381	84	118.838	10.9131	35
